# Supplementary material for: CD44v3 is a marker of invasive cancer stem cells driving metastasis in gastric carcinoma
Source: PubMed Central journal article supplement (PMC9950191; doi:10.1007/s10120-022-01357-y), 2022-12-18
Supplement: 10120_2022_1357_MOESM7_ESM.pdf [file 10120_2022_1357_MOESM7_ESM.pdf]

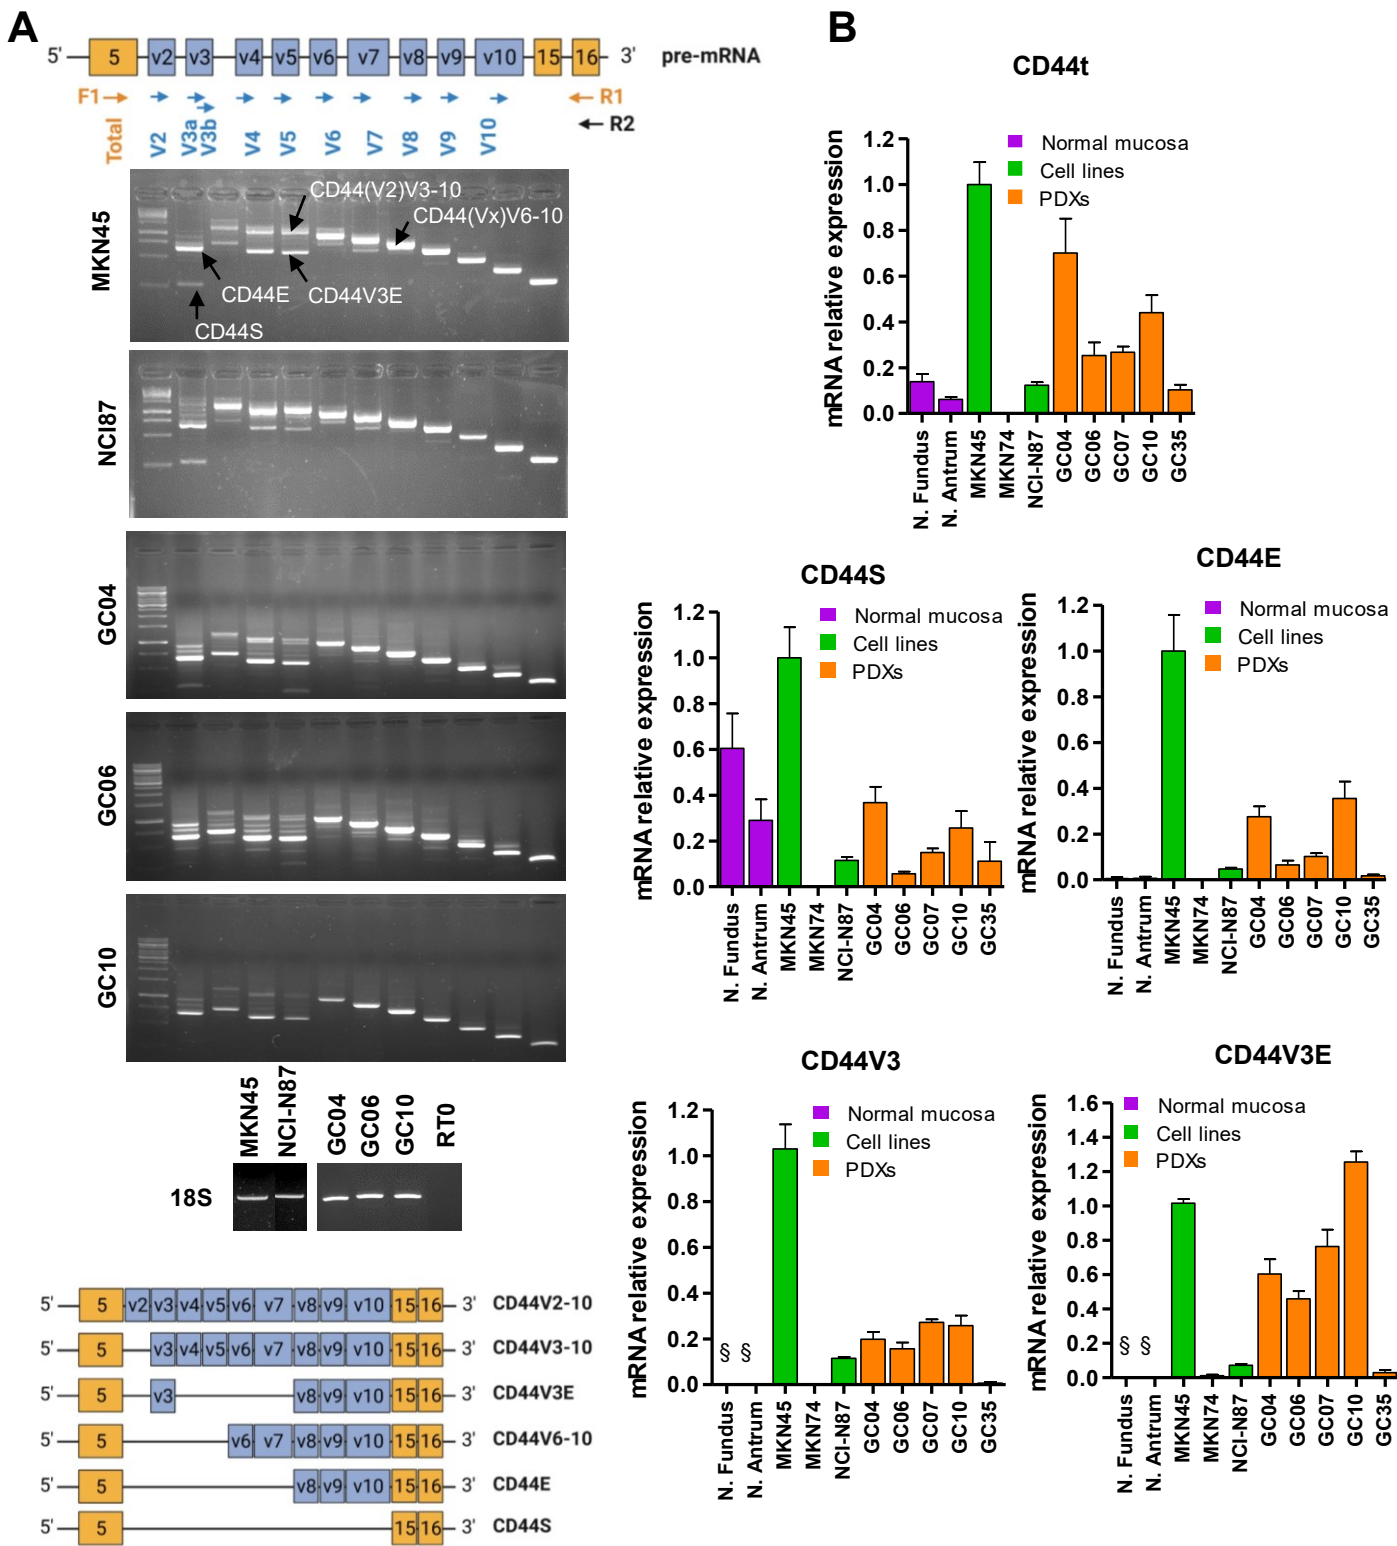

Figure S1

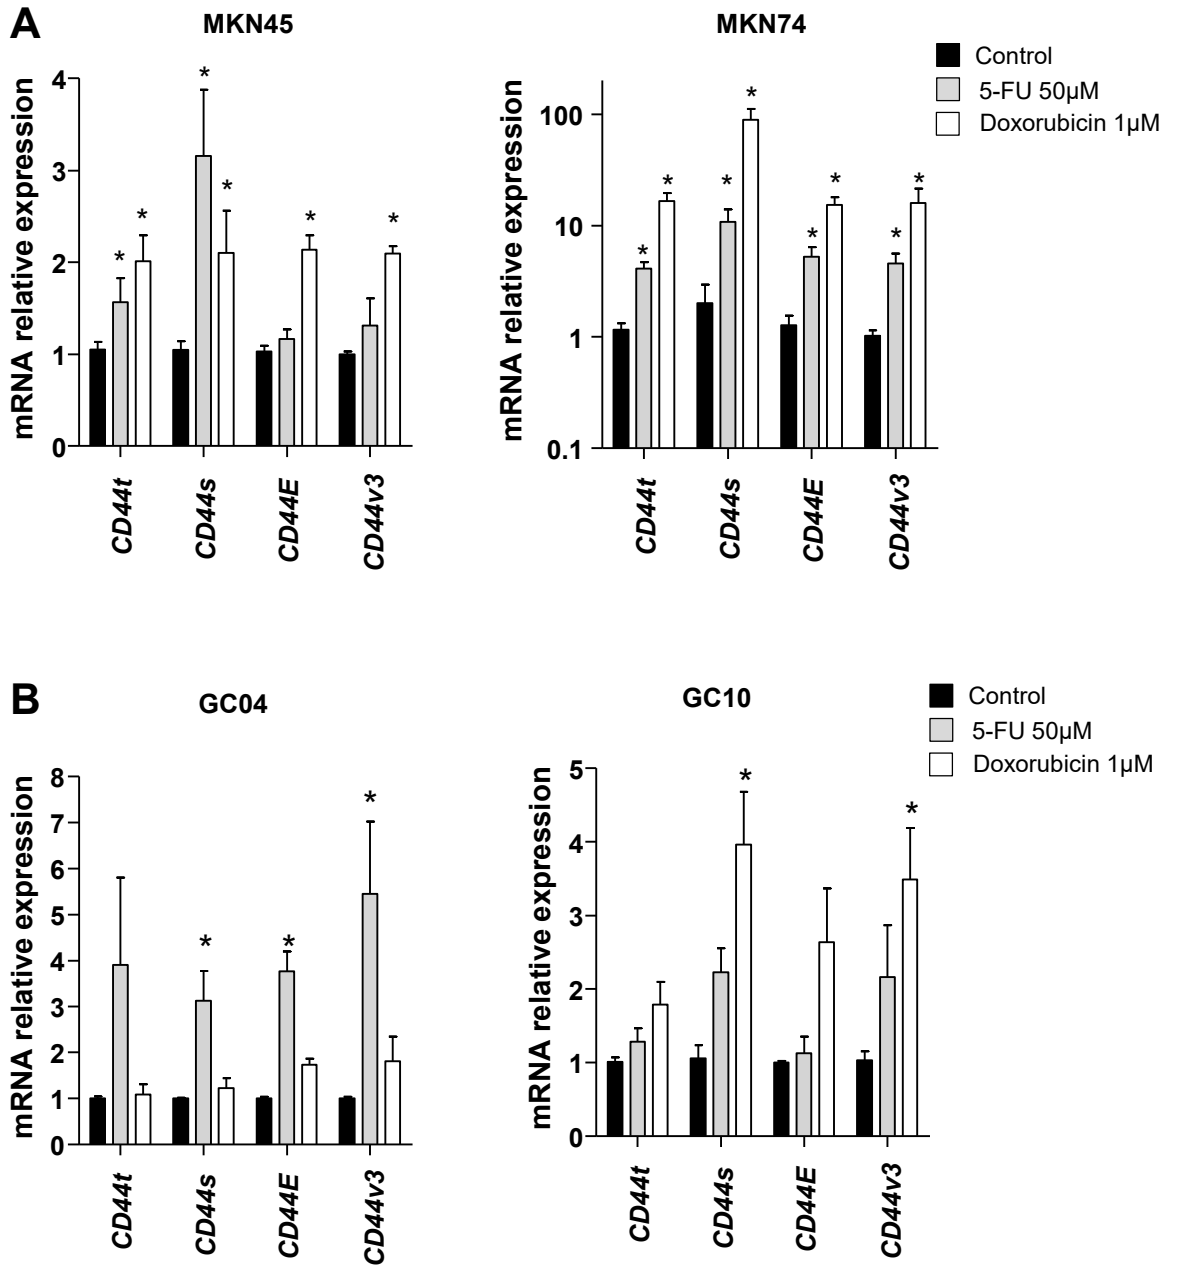

**Figure S2**

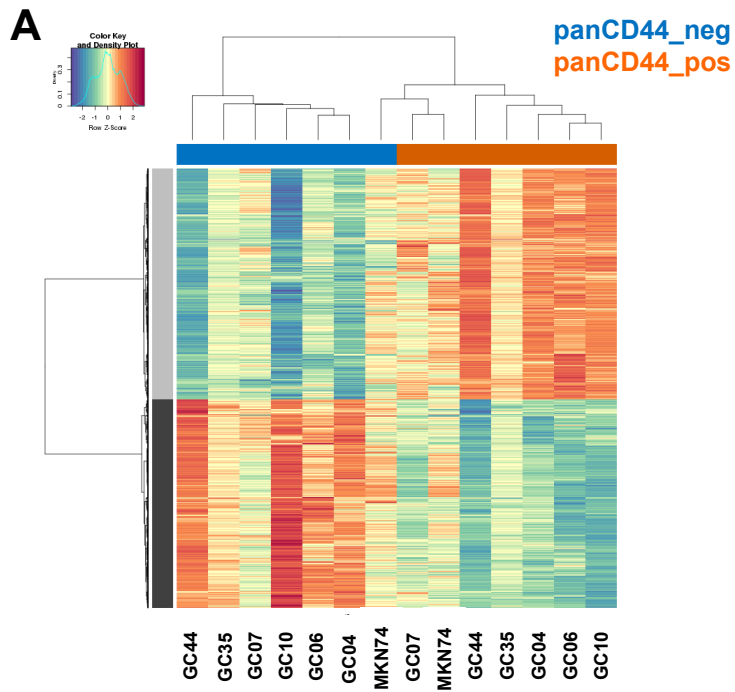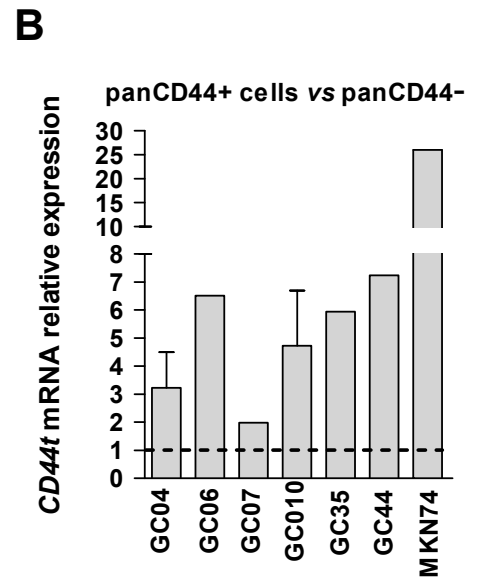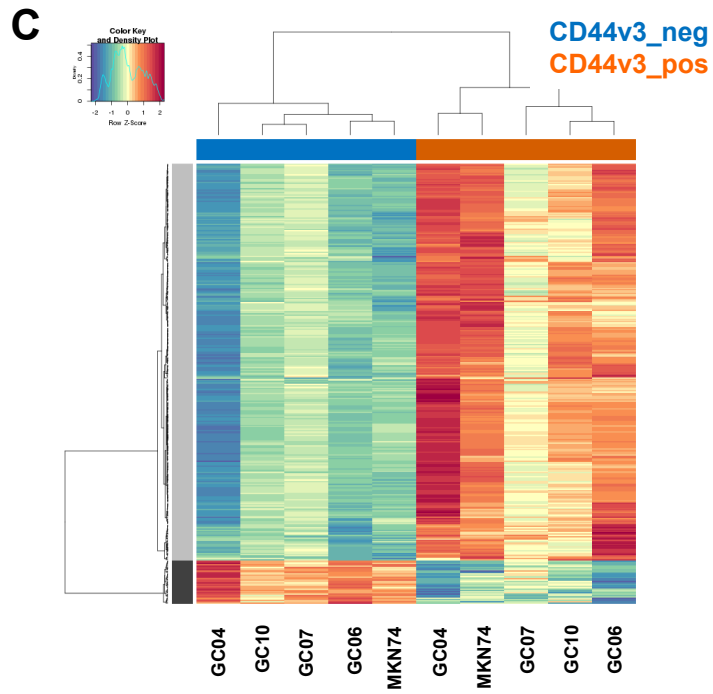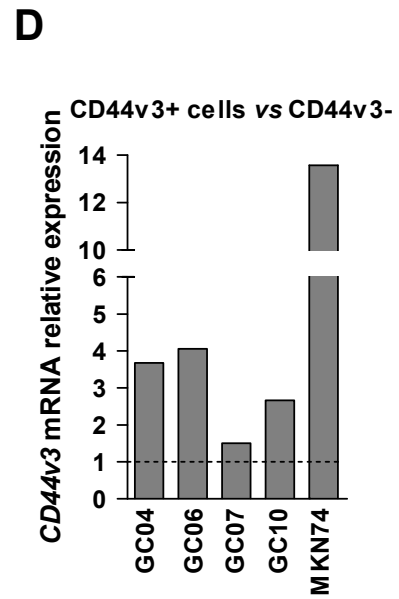

Figure S3

**A****Case GC10**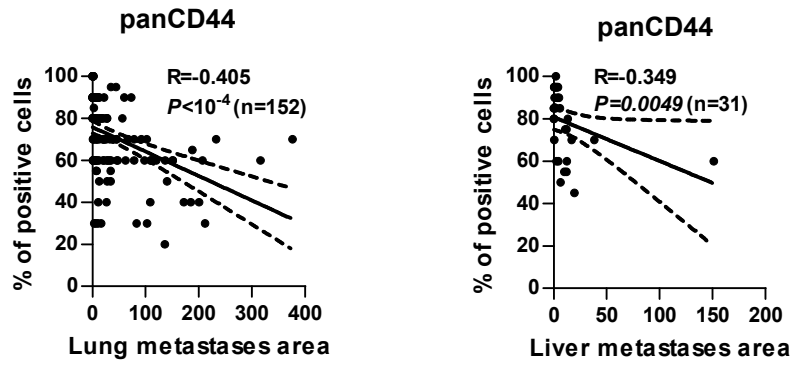**B**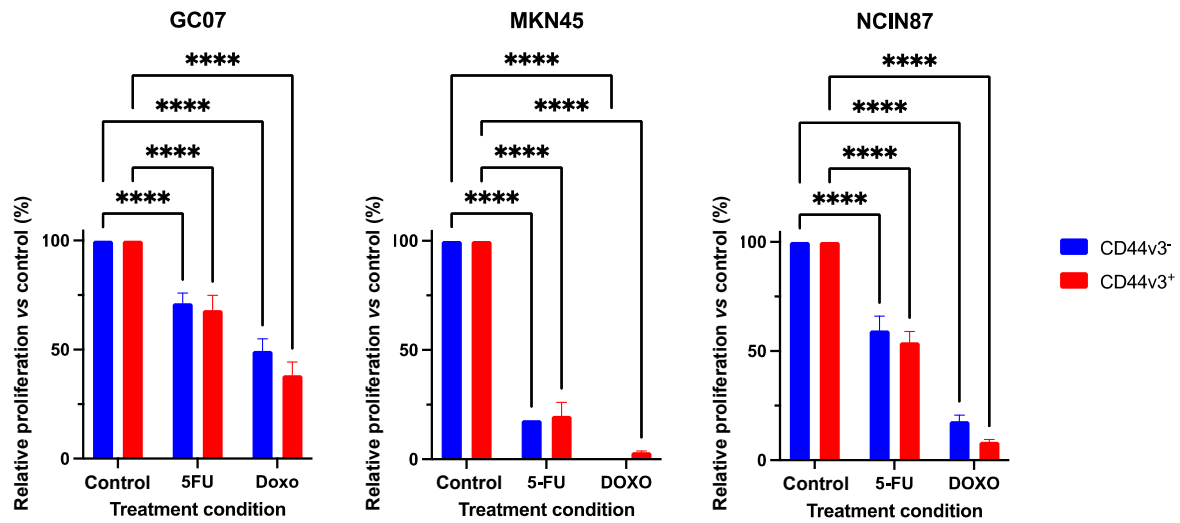**Figure S4**

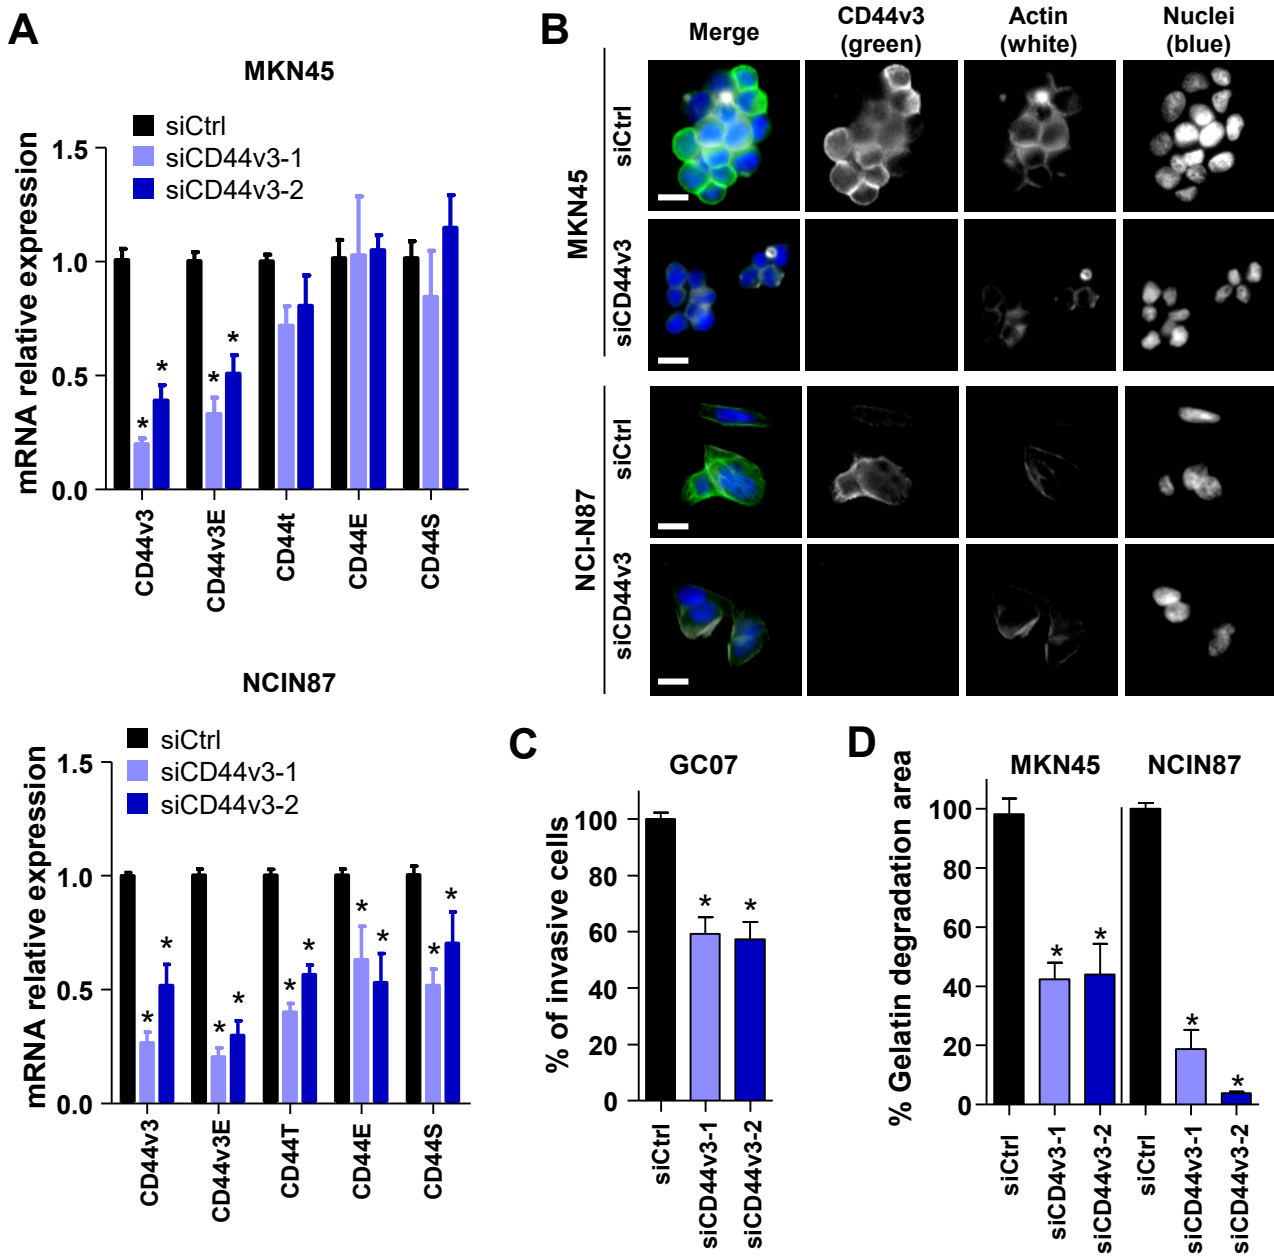

**Figure S5**

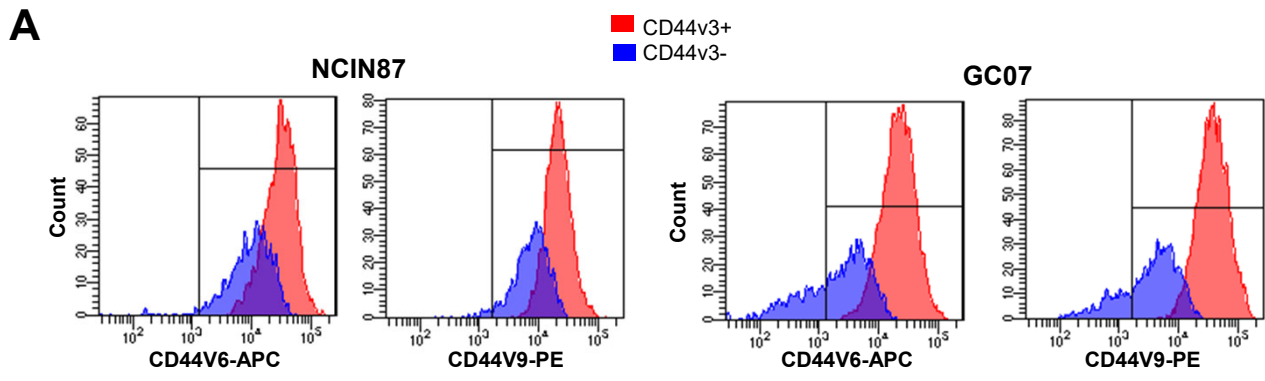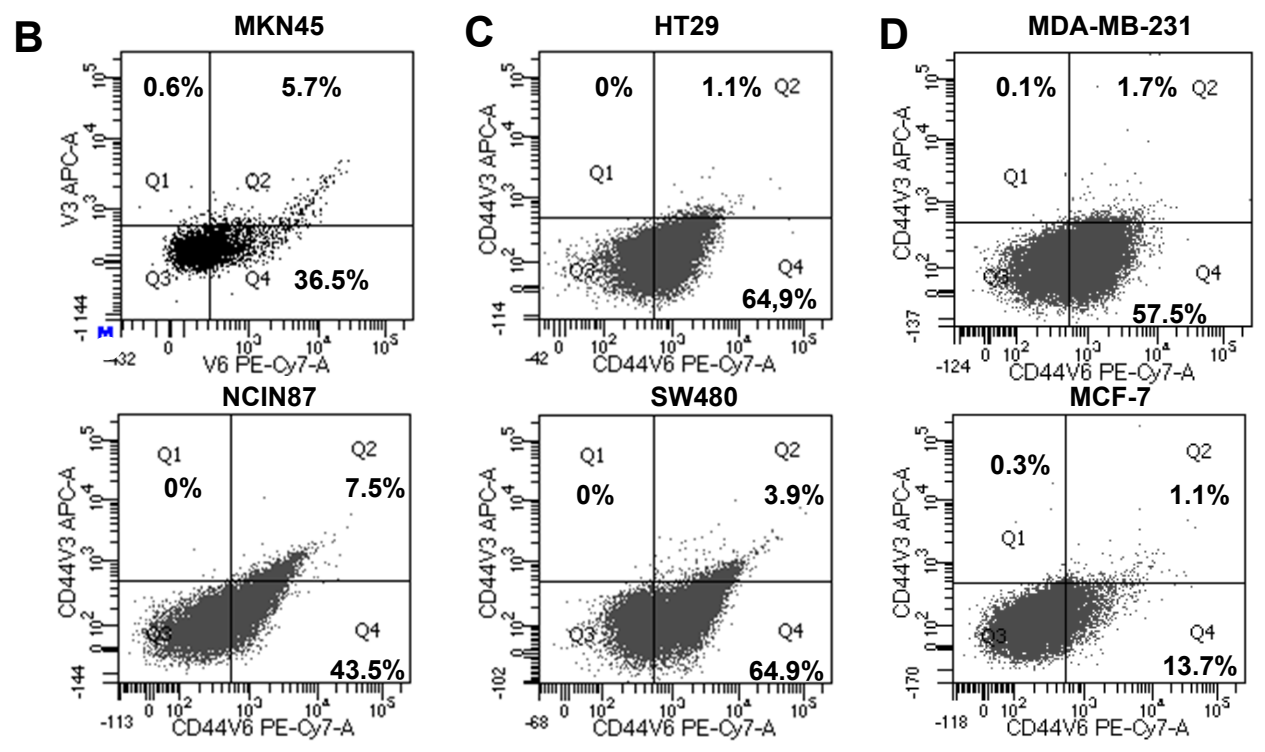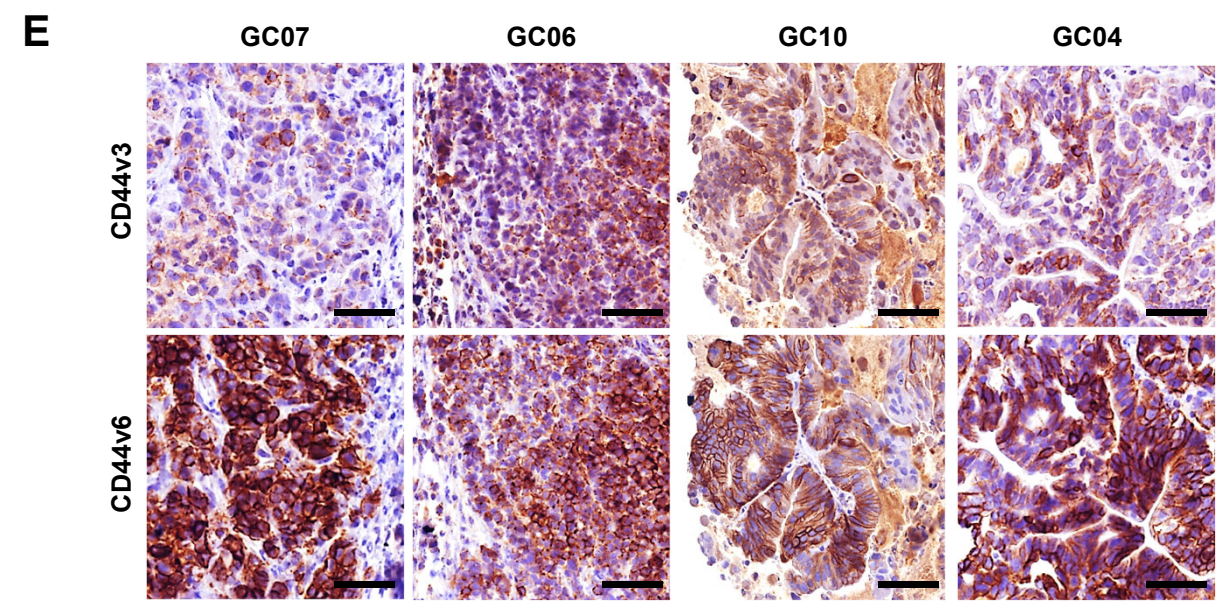

**Figure S6**

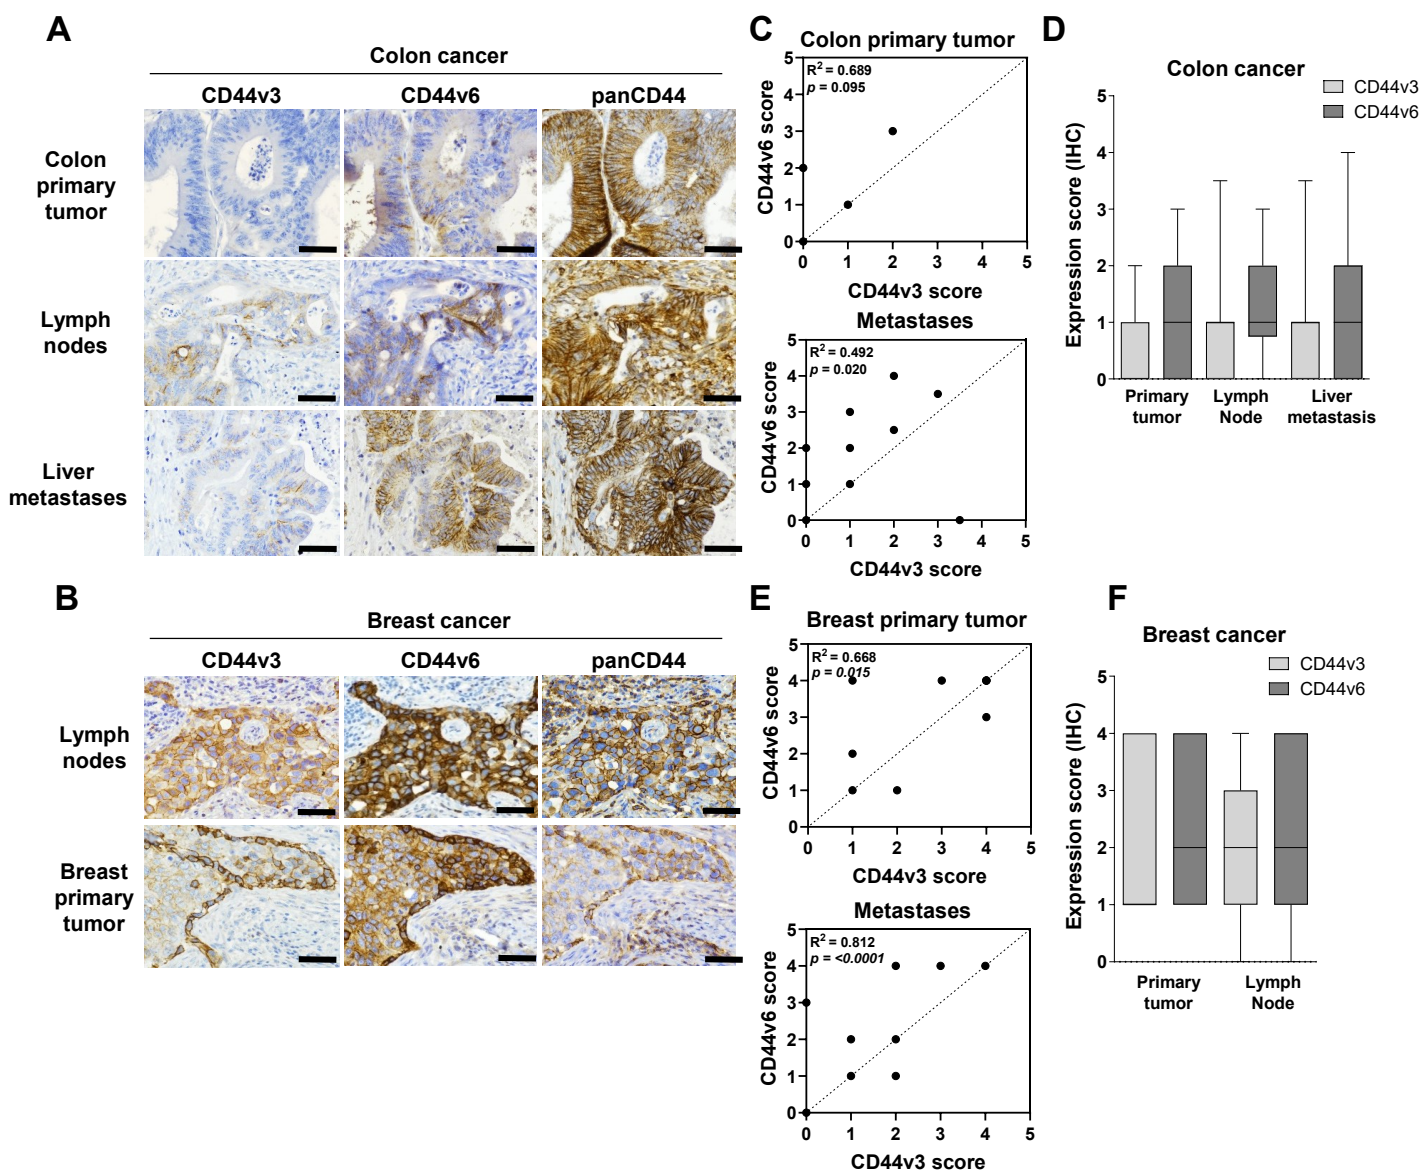

**Figure S7**

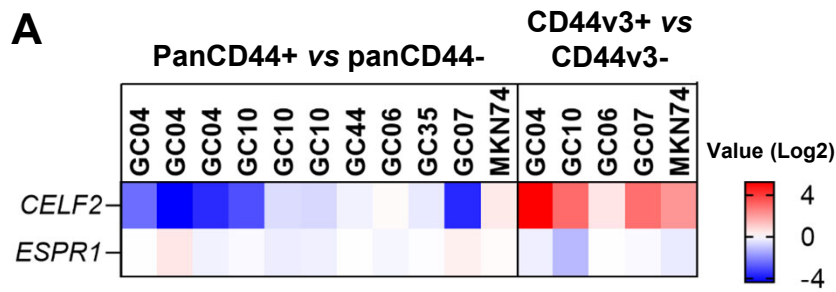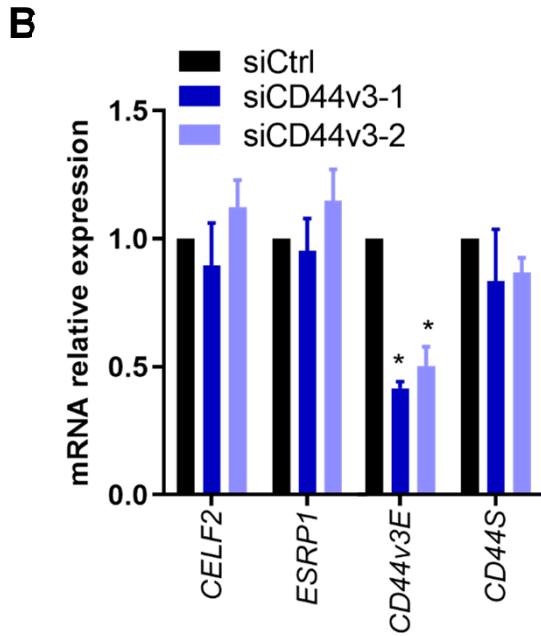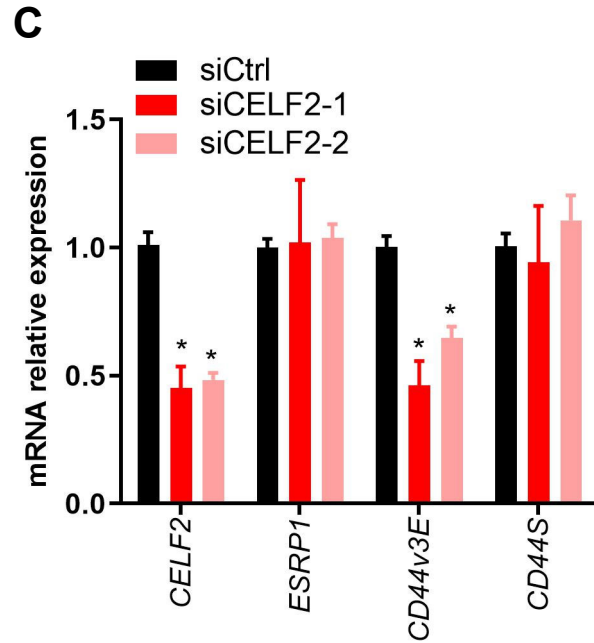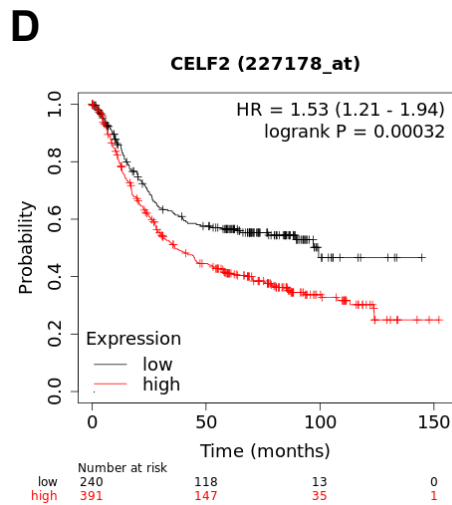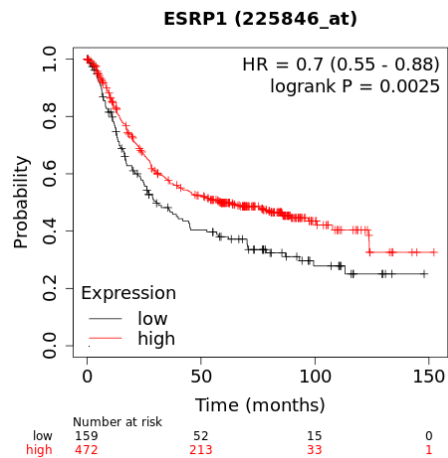

**Figure S8**
